# Supplementary material for: Mycobacterium marinum antagonistically induces an autophagic response while repressing the autophagic flux in a TORC1- and ESX-1-dependent manner
Source: PubMed Central journal article supplement (PMC5407849; doi:10.1371/journal.ppat.1006344), 2017-04-17

# S2 Fig

## A

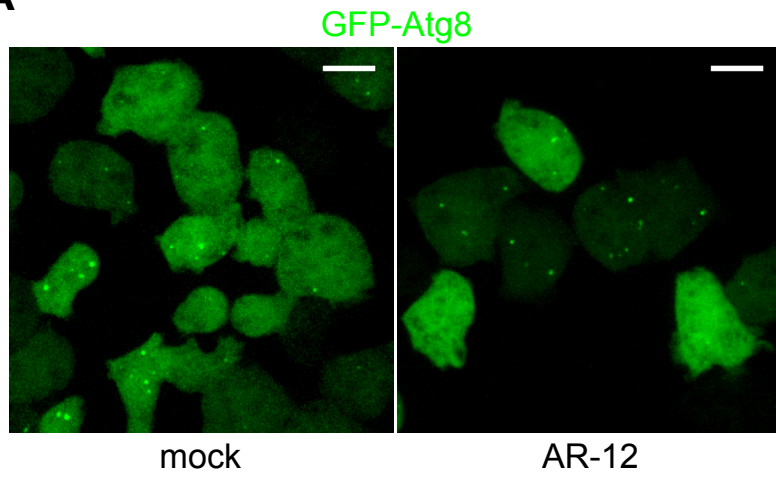

## B

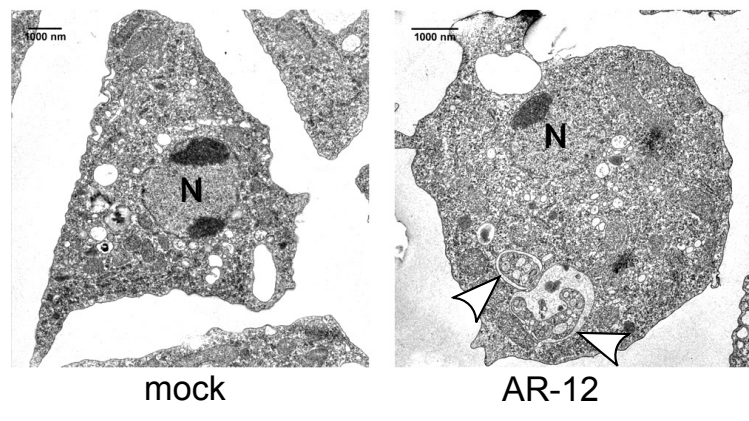

## C

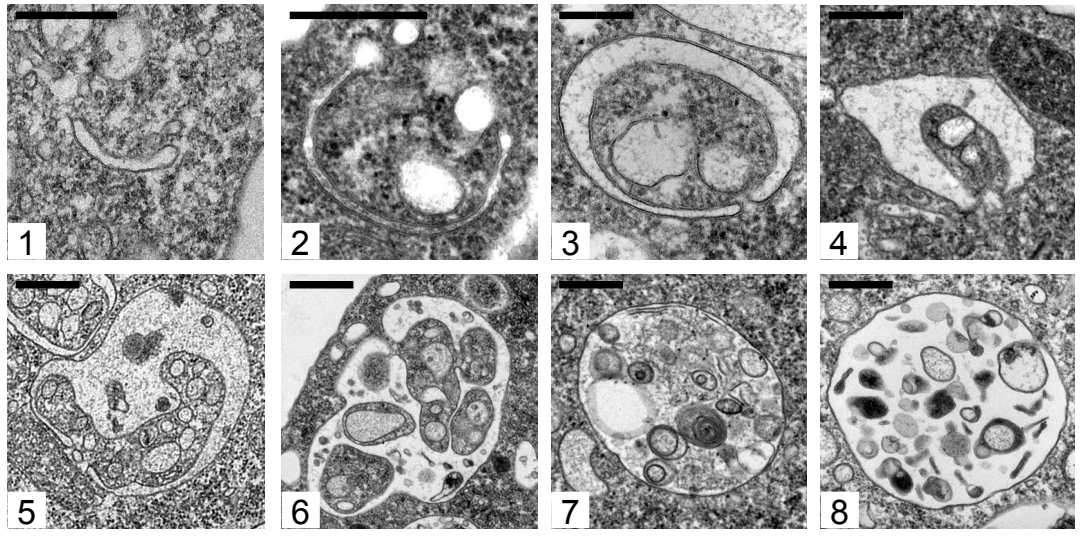

## D

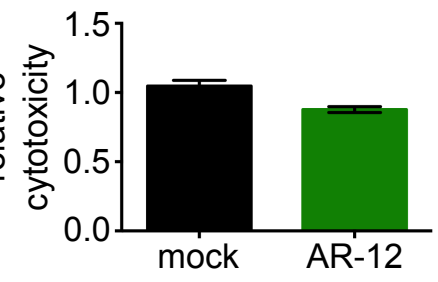

## E

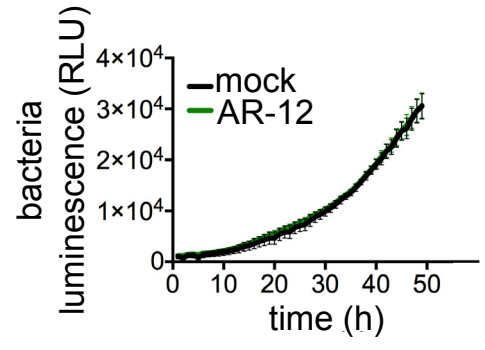

## F

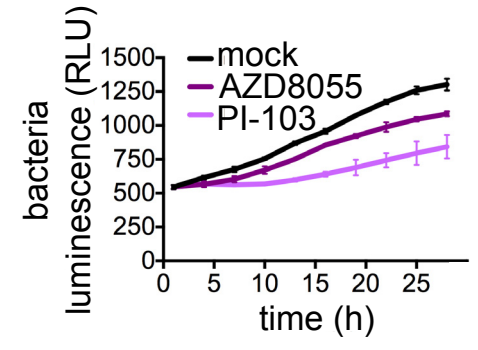

Supplement: ppat.1006344.s003.pdf [file ppat.1006344.s003.pdf]
